# Supplementary material for: In situ synthesis of metal (Bi0)–semiconductor [BiOX (X = Cl, Br, and I)] nanocomposites as a highly effective catalyst for the reduction of 4-nitrophenol to 4-aminophenol
Source: Royal Society of Chemistry journal article supplement (doi:10.1039/d4nj01126k), 2024-01-01
Supplement: d4nj01126k1.pdf [file d4nj01126k1.pdf]

## Supporting information

### ***In situ* synthesis of metal (Bi<sup>0</sup>)-semiconductor [BiOX (X = Cl, Br, and I)] nanocomposites as a highly effective catalyst for the reduction of 4- nitrophenol to 4-aminophenol**

**Dinesh Singh, Pankaj Poddar<sup>†,‡,\*</sup>**

*<sup>†</sup>Physical & Materials Chemistry Division, CSIR-National Chemical Laboratory, Pune 411008,  
India*

*<sup>‡</sup>Academy of Scientific and Innovative Research (AcSIR), Sector 19, Kamla Nehru Nagar,  
Ghaziabad, Uttar Pradesh- 201002, India*

\*Corresponding author e-mail: [p.poddar@ncl.res.in](mailto:p.poddar@ncl.res.in).

### 2.2.2 Synthesis of metallic Bi<sup>0</sup> particles

We have synthesized metallic bismuth particles in aqueous medium. Initially, we combined 2 grams of bismuth nitrate with 80 ml of distilled water and 3 ml-5 ml of nitric acid in a sealed glass reactor. We then agitated the mixture until the solution became clear. Additionally, a new solution of NaBH<sub>4</sub> was created in a beaker by dissolving 700 mg of NaBH<sub>4</sub> in 10 ml of distilled water<sup>43</sup>. Further, this solution was injected slowly using a syringe into the sealed reactor while it was being stirred and ensured that the reactor already contained a transparent solution of bismuth nitrate. A dark black precipitate was generated upon the addition of NaBH<sub>4</sub> solution. Following the creation of the black precipitate, stirring was halted, and the remaining water was promptly eliminated from the reactor. The precipitate was collected by rinsing it with isopropanol two to three times and dried at a temperature of 60 °C in an oven for a duration of four hours. The obtained dry black powder was ground for further analysis.

| Samples | Crystallite size (nm) |
|---------|-----------------------|
| BOC     | 17 ± 4                |
| BOB     | 16 ± 4                |
| BOI     | 15 ± 4                |

**Table S1:** Crystallite size of BOC, BOB, and BOI with respect to (001) planes.

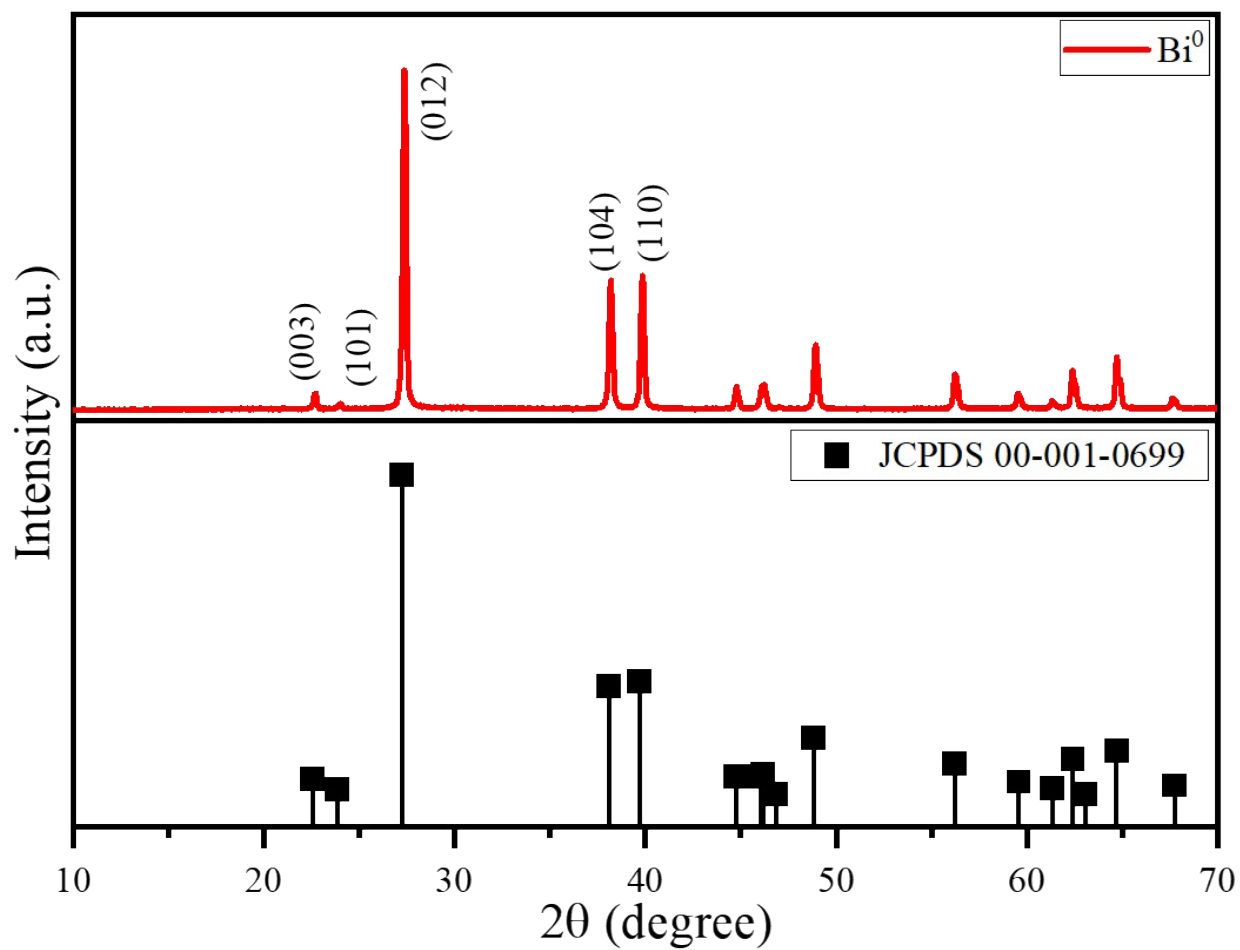

**Figure S1:** XRD spectrum of individually synthesized Bi<sup>0</sup>.

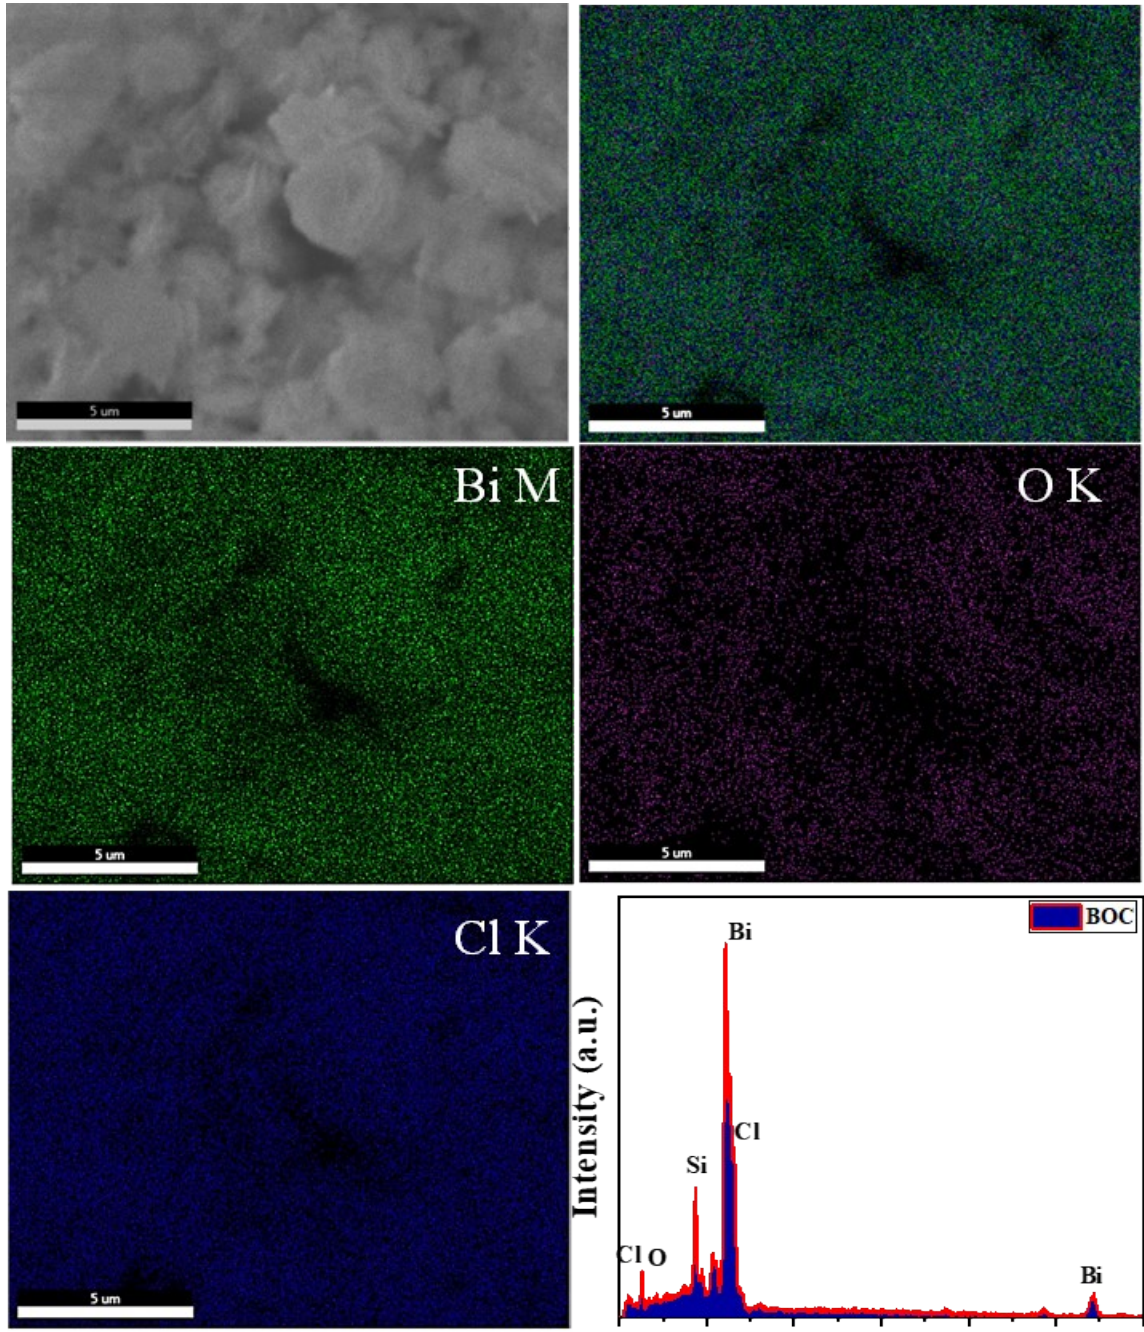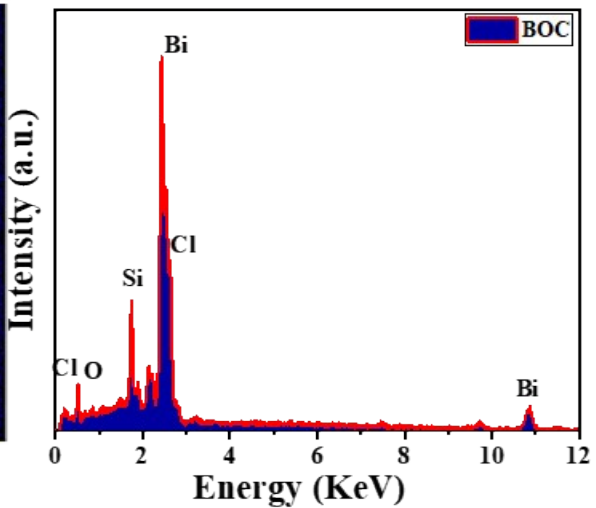



**Figure S2:** Elemental mapping and EDAX spectrum of BOC sample.

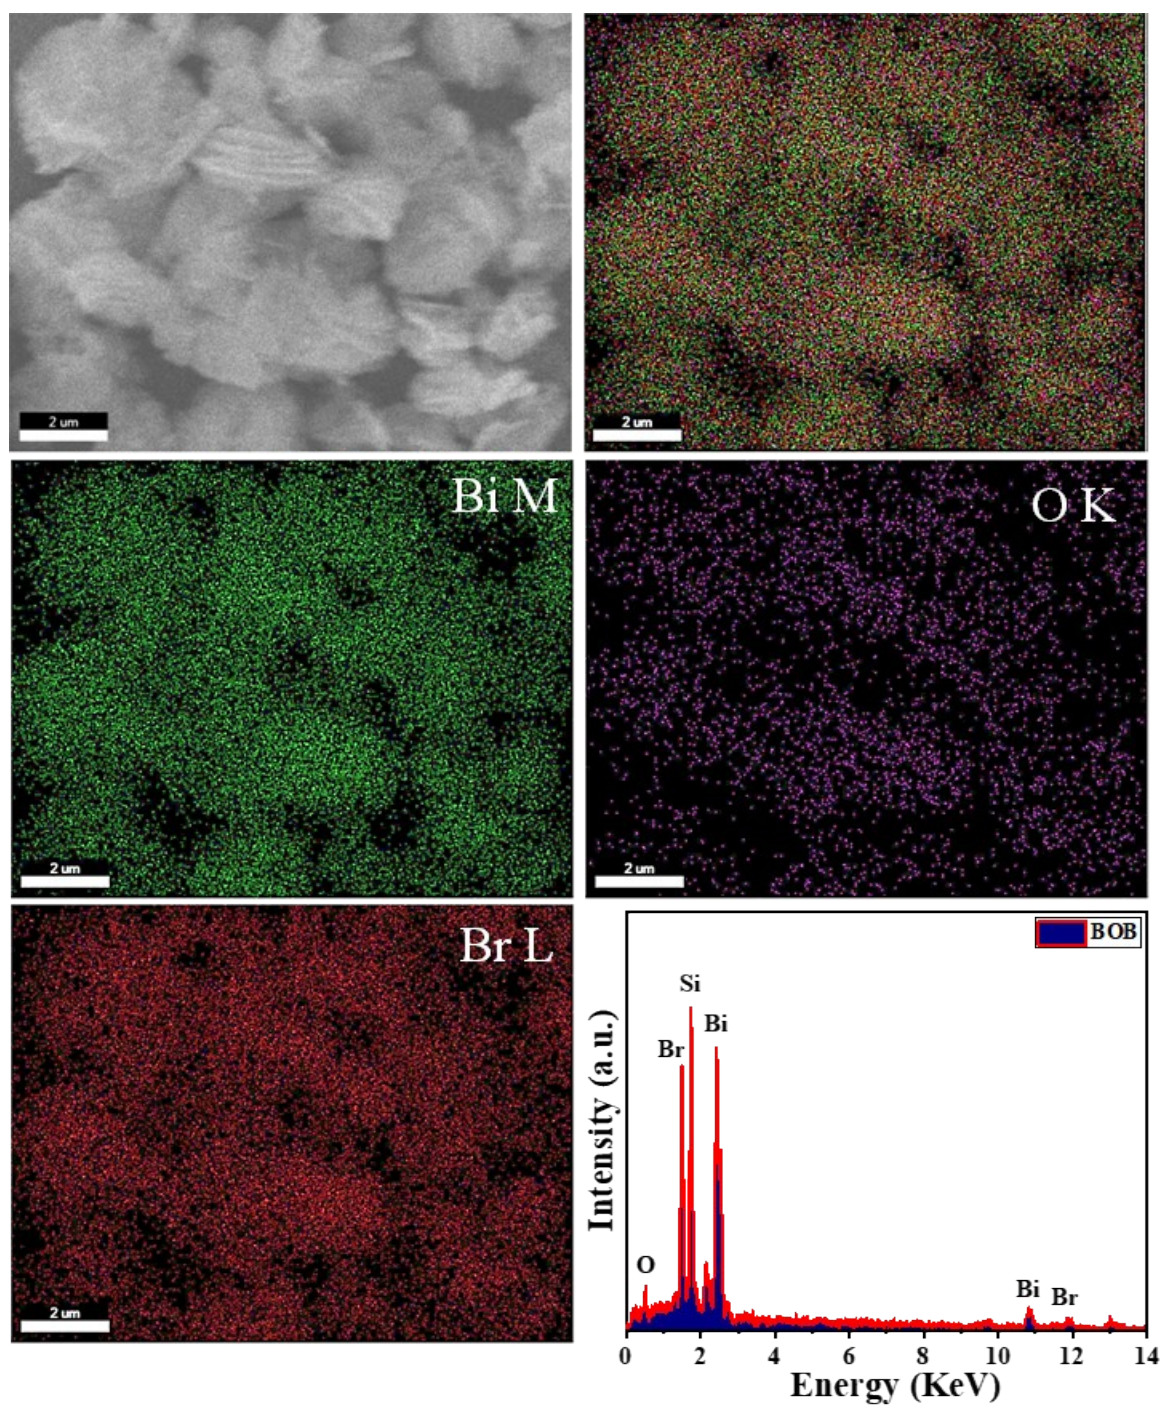



**Figure S3:** Elemental mapping and EDAX spectrum of BOB sample

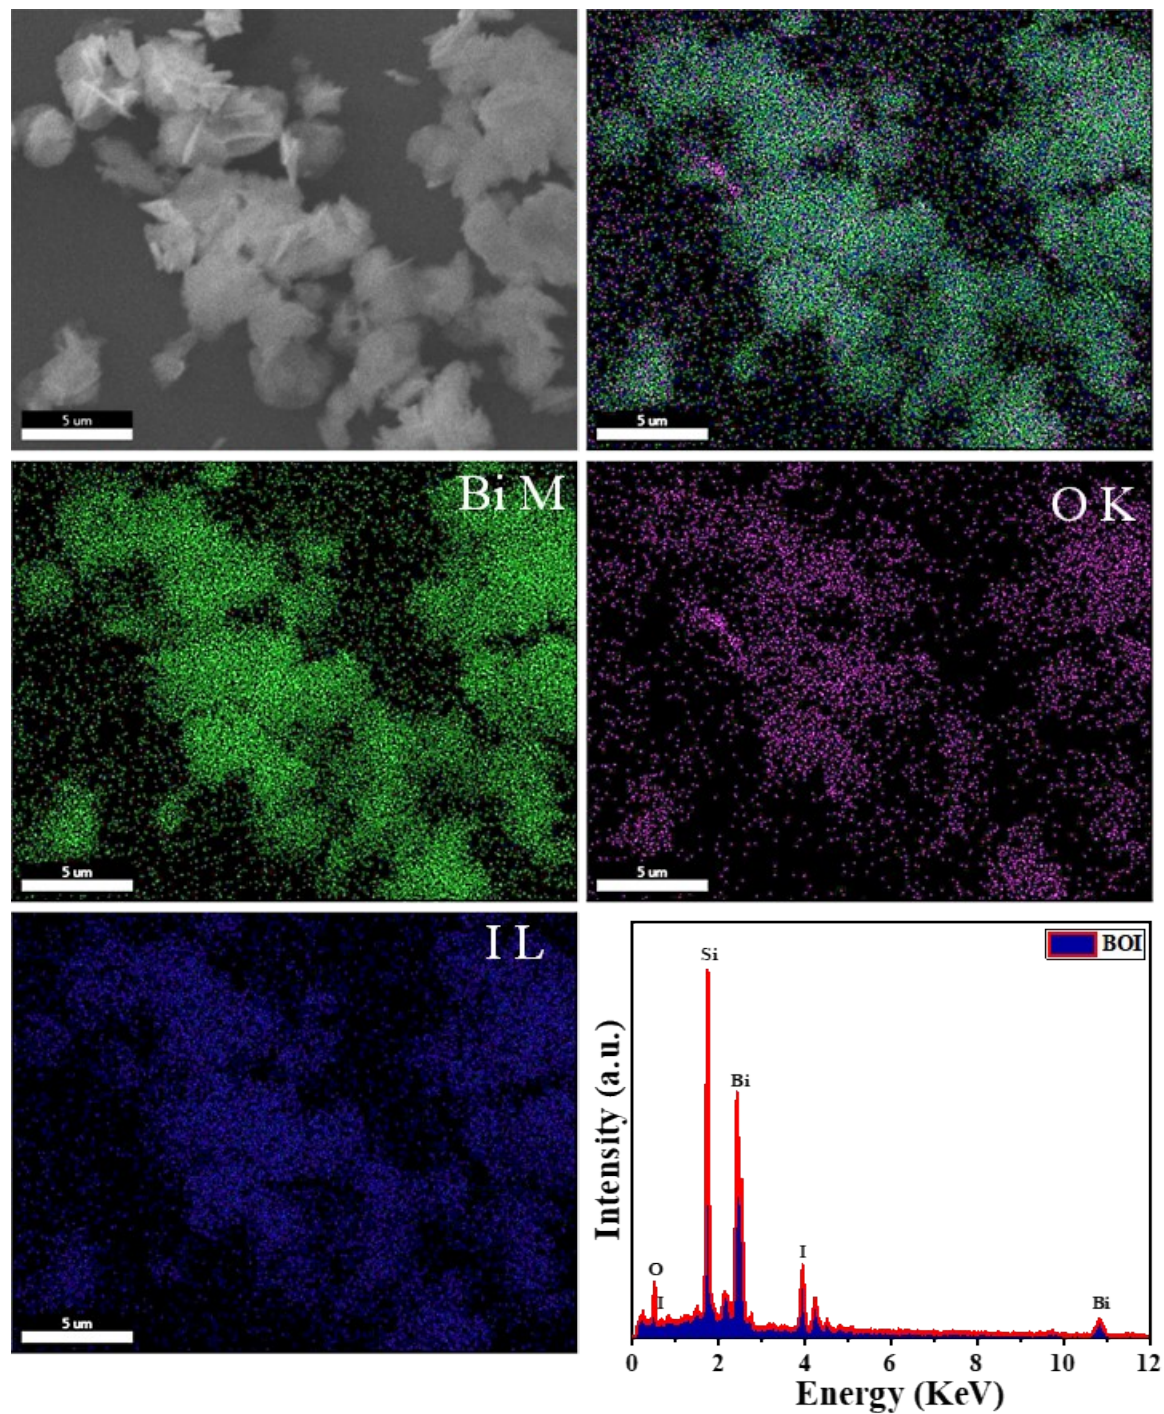

**Figure S4:** Elemental mapping and EDAX spectrum of BOI sample.

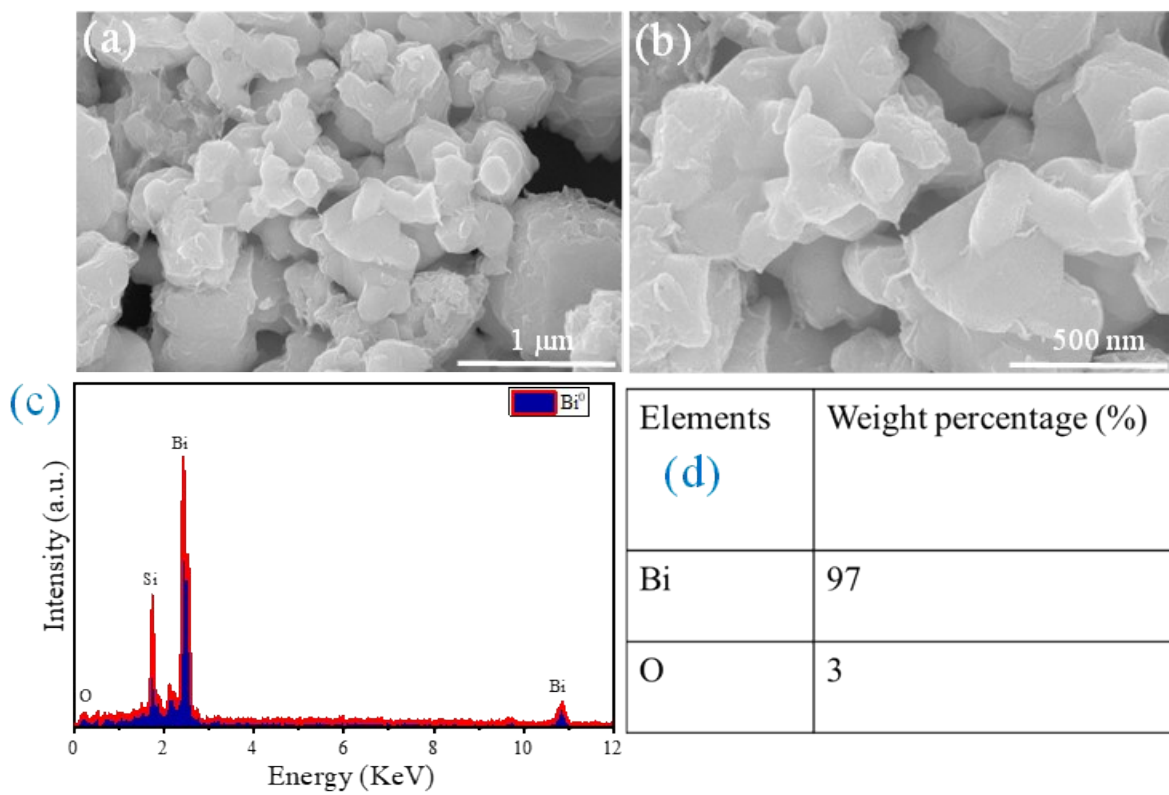

**Figure S5:** (a), (b) morphology of Bi<sup>0</sup> at 1 μm and 500 nm scale, (c) EDAX spectrum of Bi<sup>0</sup>, and (d) weight percentage of Bi<sup>0</sup>.

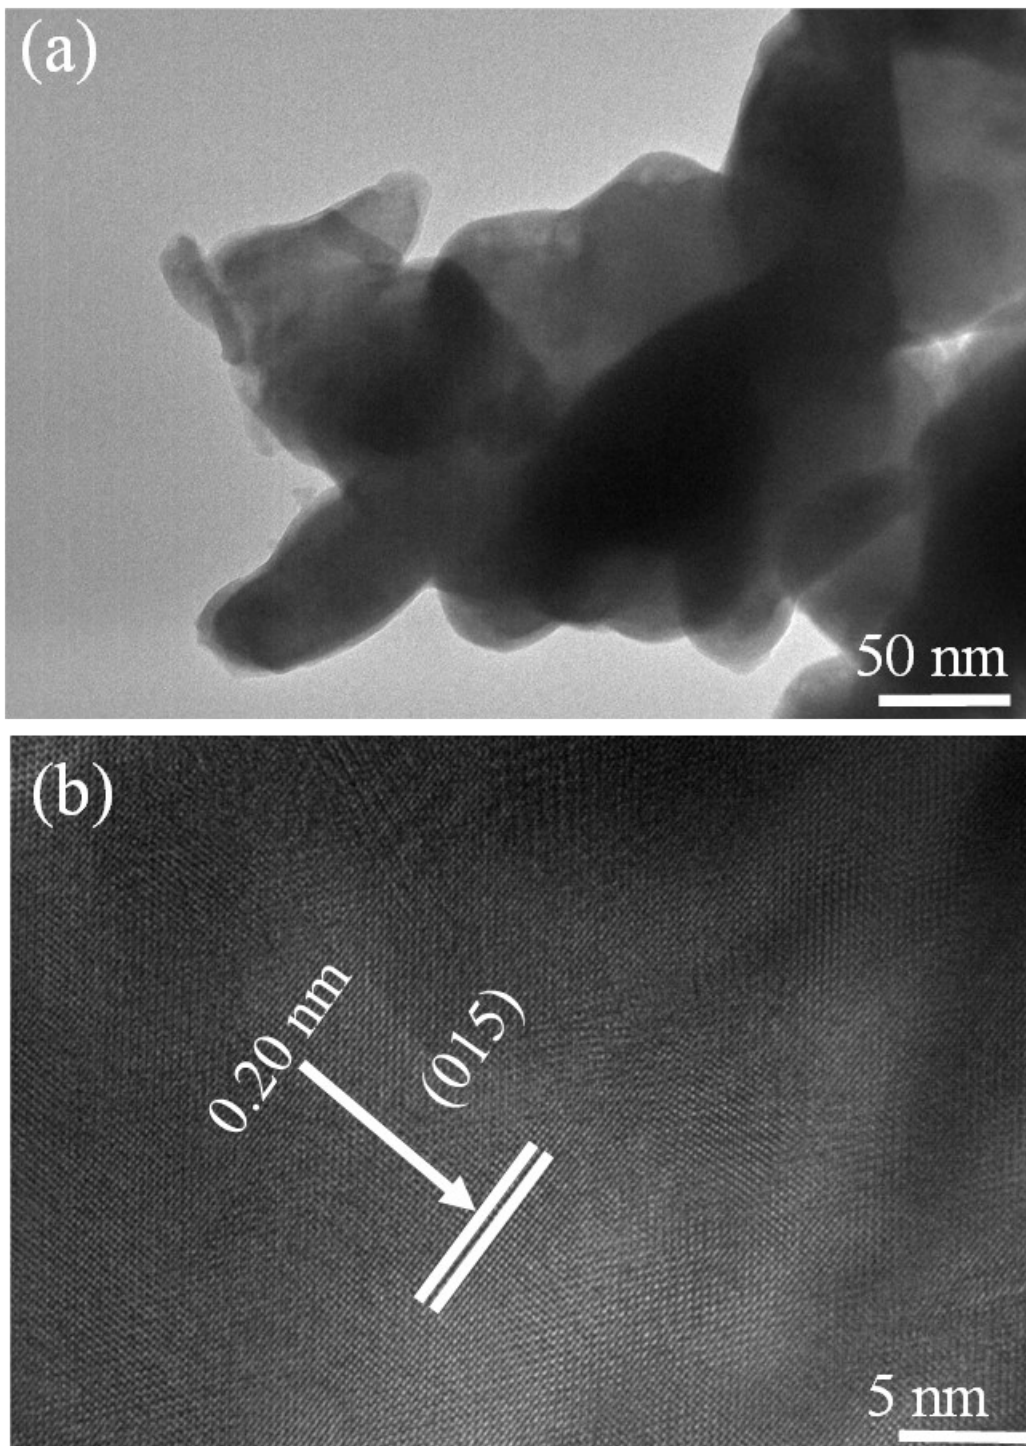

**Figure S6:** (a) TEM image of individual synthesized metallic Bi<sup>0</sup> and (b) d-spacing between (015) planes of Bi<sup>0</sup>.



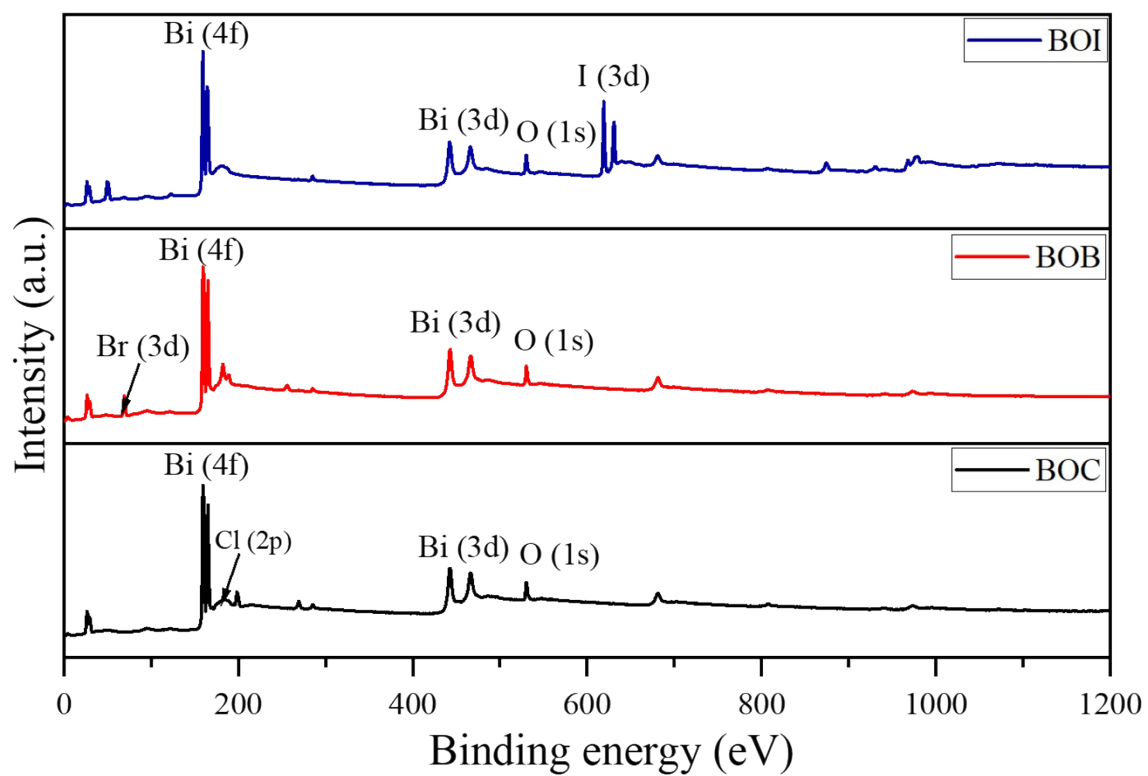

**Figure S7:** XPS survey spectrum of BOC, BOB, and BOI.

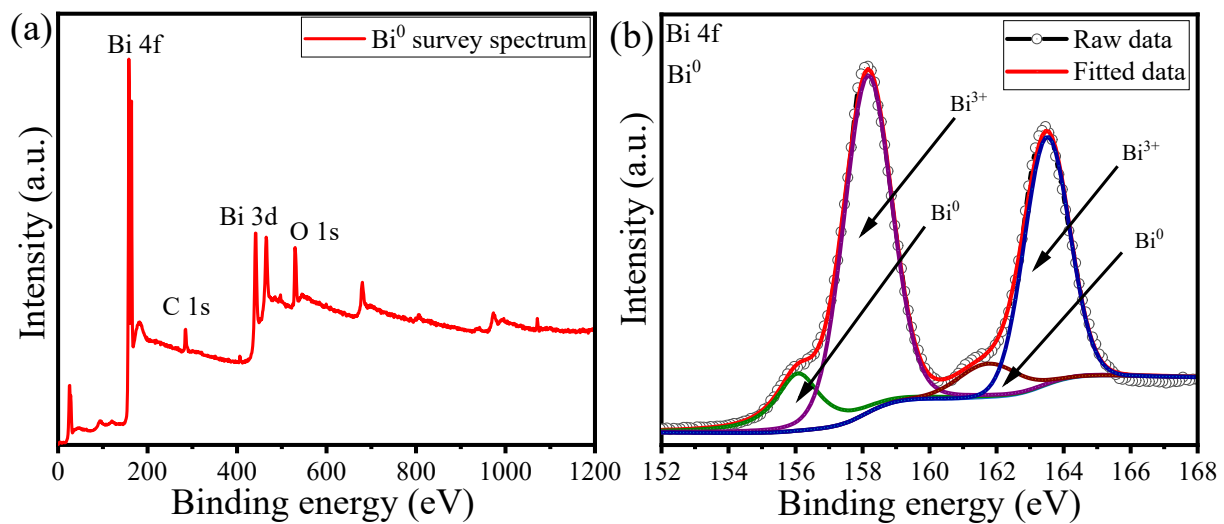

**Figure: S8** (a) XPS survey spectrum of individual synthesized metallic Bi<sup>0</sup>, and (b) high-resolution XPS spectrum of Bi 4f.

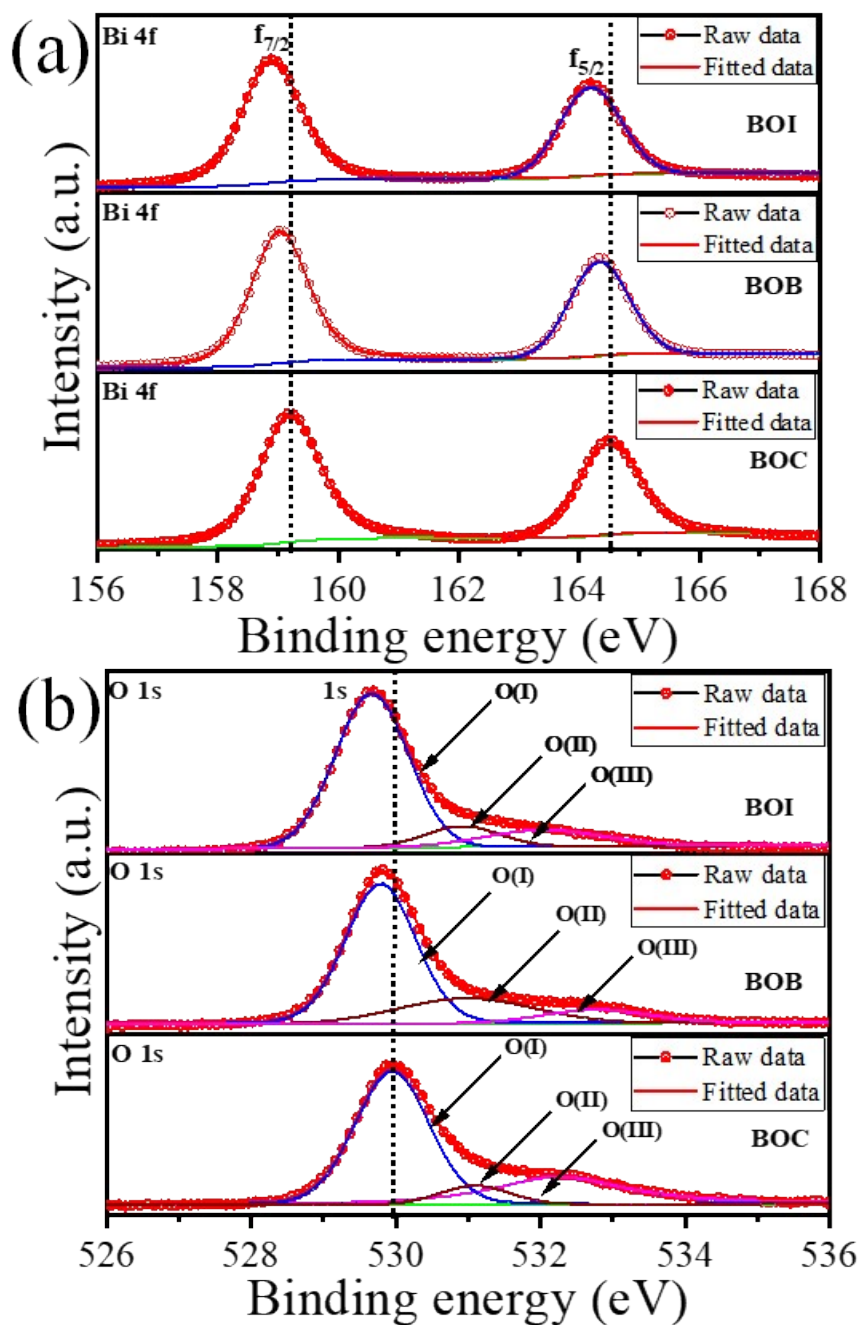

**Figure S9:** (a) comparison in the binding energy of High-resolution Bi 4f XPS spectrum of BOC, BOB, and BOI samples, and (b) comparison of the binding energy of O 1s XPS spectrum of BOC, BOB, and BOI samples.

| Catalysts                               |                            |                                           | Activity factor<br>(AF) = $k/\text{catalyst}$<br>weight | References |
|-----------------------------------------|----------------------------|-------------------------------------------|---------------------------------------------------------|------------|
| Active metals                           | Weight of<br>catalyst (mg) | Rate<br>constant<br>( $\text{min}^{-1}$ ) | ( $\text{min}^{-1} \cdot \text{mg}^{-1}$ )              |            |
| Bi <sup>0</sup> -BOI                    | 4                          | 0.529                                     | 0.132                                                   | This work  |
| Bi <sup>0</sup> -BOB                    | 4                          | 0.098                                     | 0.025                                                   |            |
| Bi <sup>0</sup> -BOC                    | 4                          | 0.095                                     | 0.023                                                   |            |
| Individual Bi <sup>0</sup><br>particles | 4                          | 0.007                                     | 0.0015                                                  |            |
| Dodecanethiol<br>capped Bi NPs          | 3.5                        | 0.233                                     | 0.066                                                   | 2          |
| Ni/SG-SWCNTs                            | 15                         | 0.083                                     | 0.0056                                                  | 56         |
| Nickel/Gold<br>Nanostructures           | 8                          | 0.08                                      | 0.01                                                    | 57         |
| Cu-Ni/GP                                | 10                         | 0.36                                      | 0.036                                                   | 58         |
| Au NCs                                  | 6                          | 0.126                                     | 0.021                                                   | 59         |

**Table S2:** Comparison of catalytic activity of BiOX (Cl, Br, and I) with different catalysts.



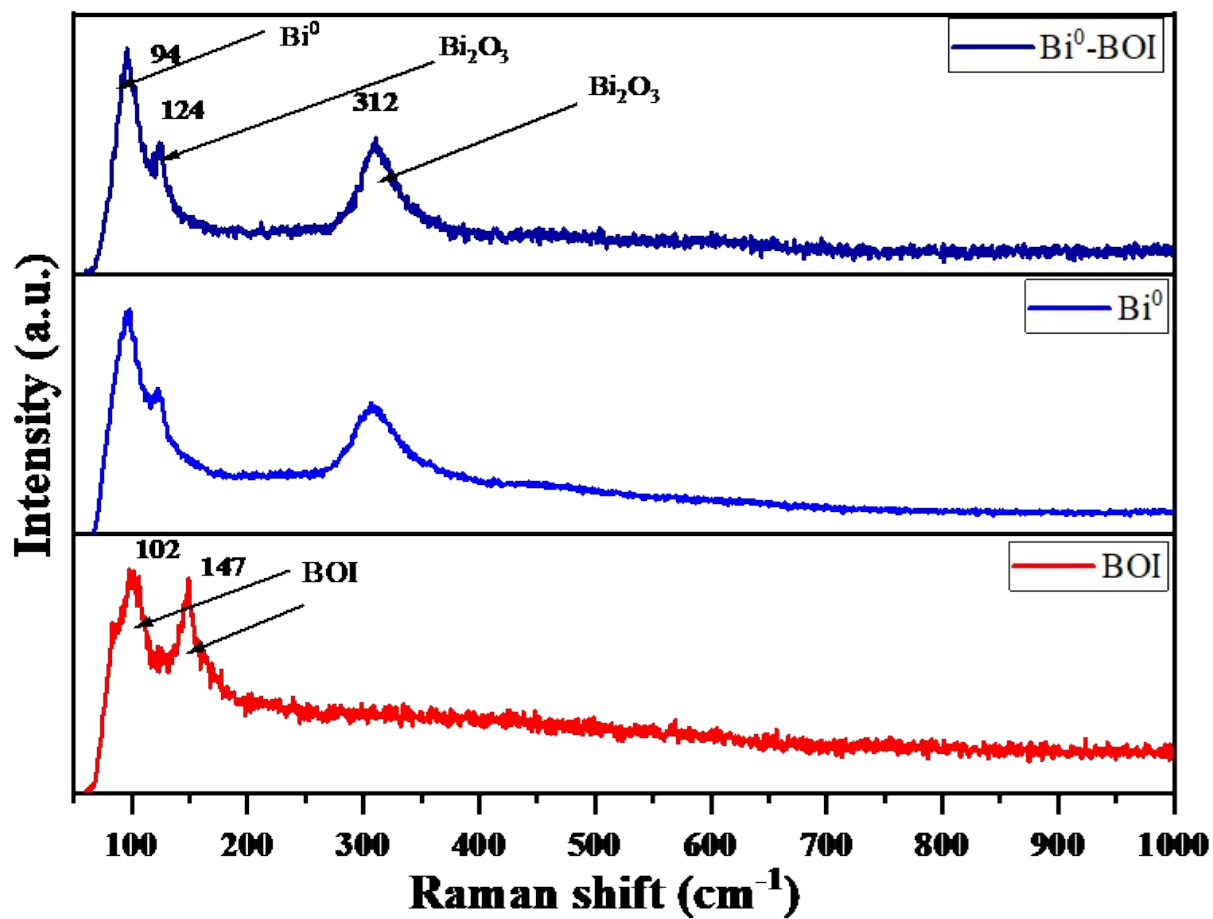

**Figure S10:** Raman spectrum of BOI, individually synthesized  $\text{Bi}^0$ , and in situ  $\text{Bi}^0\text{-BOI}$ .

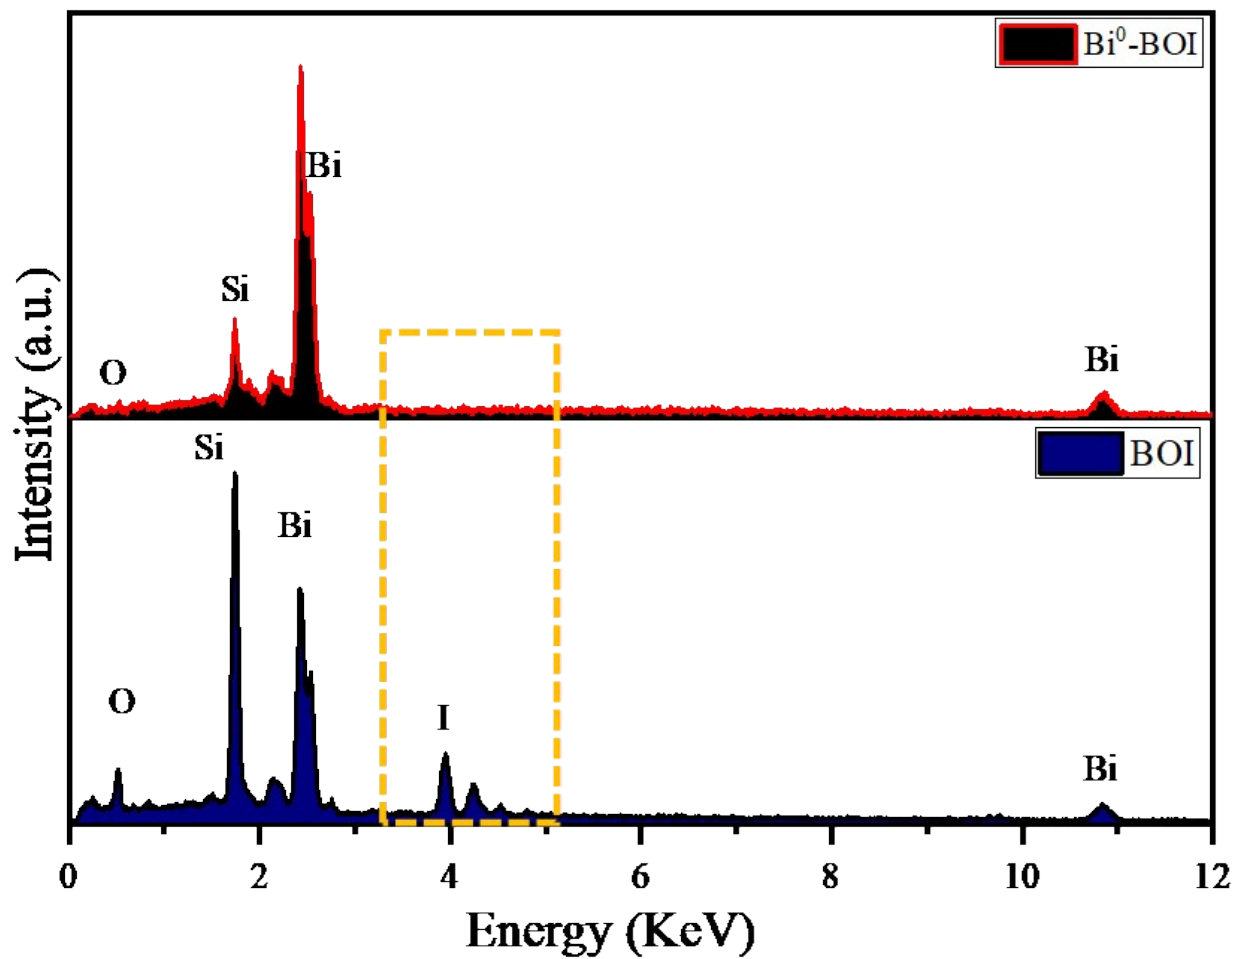

Figure S11: EDAX spectrum of BOI and Bi<sup>0</sup>-BOI.

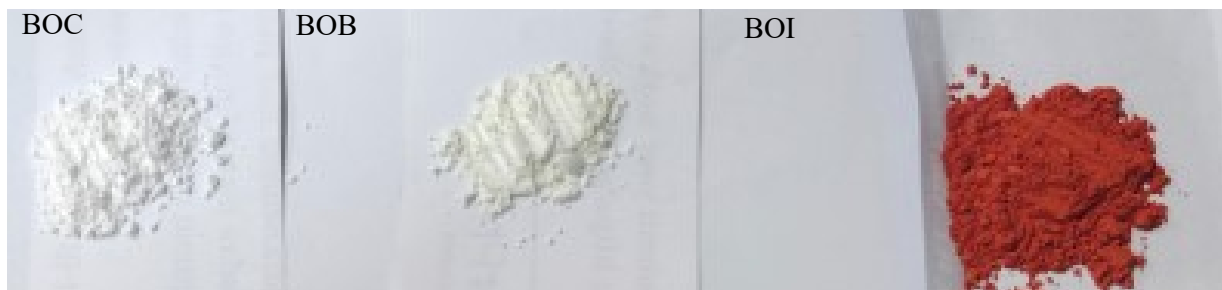

Before reduction

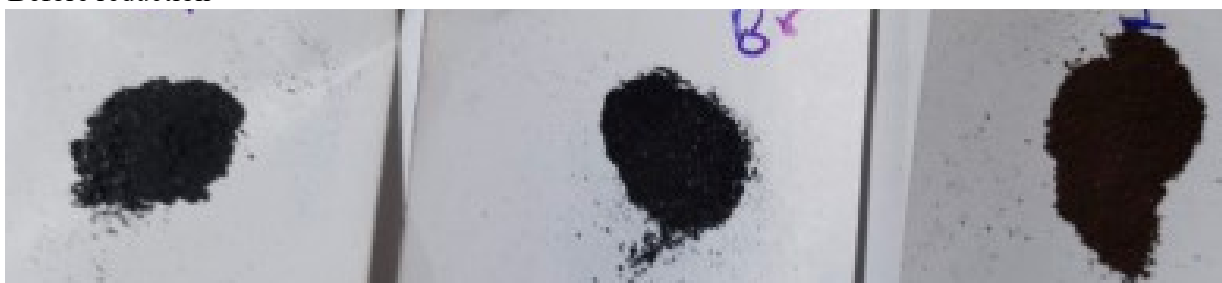

After reduction

**Figure S12:** Color changes of BOC, BOB, and BOI samples before and after 4-NP reduction.

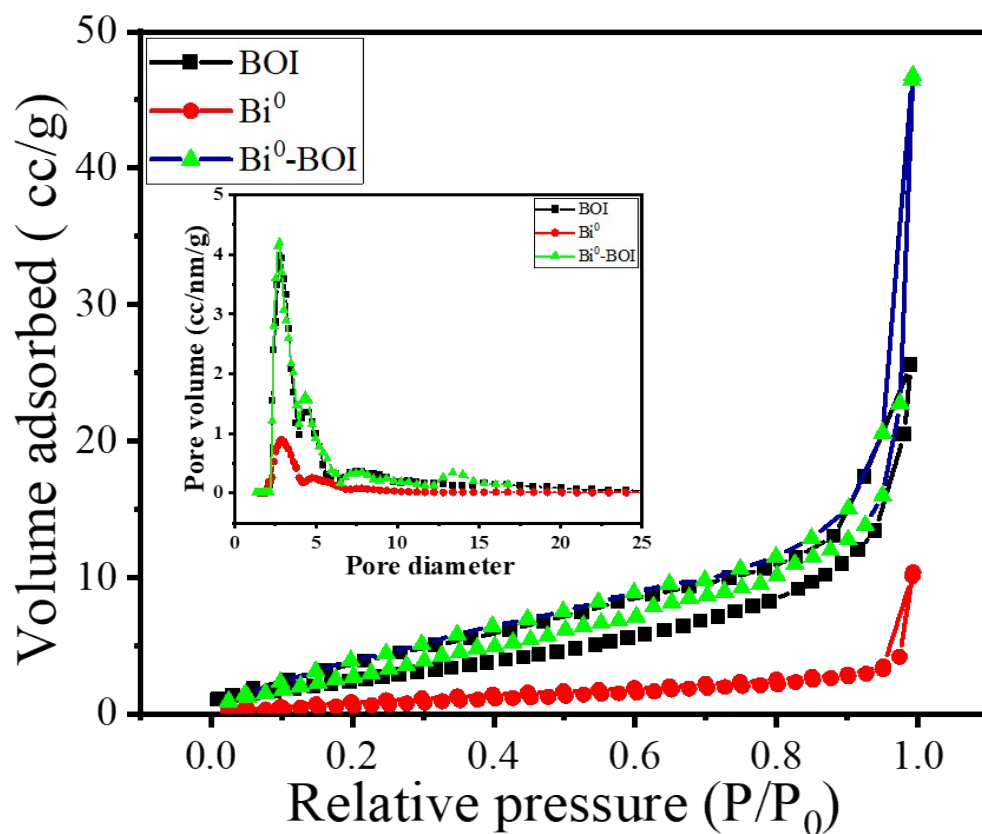

**Figure S13:** Adsorption and desorption isotherm of BOI, pristine  $\text{Bi}^0$ , and in situ  $\text{Bi}^0$ -BOI catalysts.

| Samples            | Surface area ( $\text{m}^2/\text{g}$ ) | Pore volume ( $\text{cc}/\text{g}$ ) |
|--------------------|----------------------------------------|--------------------------------------|
| BOI                | 8 $\text{m}^2/\text{g}$                | 0.025 $\text{cc}/\text{g}$           |
| $\text{Bi}^0$      | 3 $\text{m}^2/\text{g}$                | 0.008 $\text{cc}/\text{g}$           |
| $\text{Bi}^0$ -BOI | 14 $\text{m}^2/\text{g}$               | 0.042 $\text{cc}/\text{g}$           |

**Table S13:** Texture parameters of BOI,  $\text{Bi}^0$ , and  $\text{Bi}^0$ -BOI calculated by the DFT method.
